# Supplementary material for: Characterization of platelet-related genes and constructing signature combined with immune-related genes for predicting outcomes and immunotherapy response in lung squamous cell carcinoma
Source: PubMed Central journal article supplement (PMC10415560; doi:10.18632/aging.204886), 2023-07-20
Supplement: aging-15-204886-s001.pdf [file aging-15-204886-s001.pdf]

SUPPLEMENTARY FIGURE

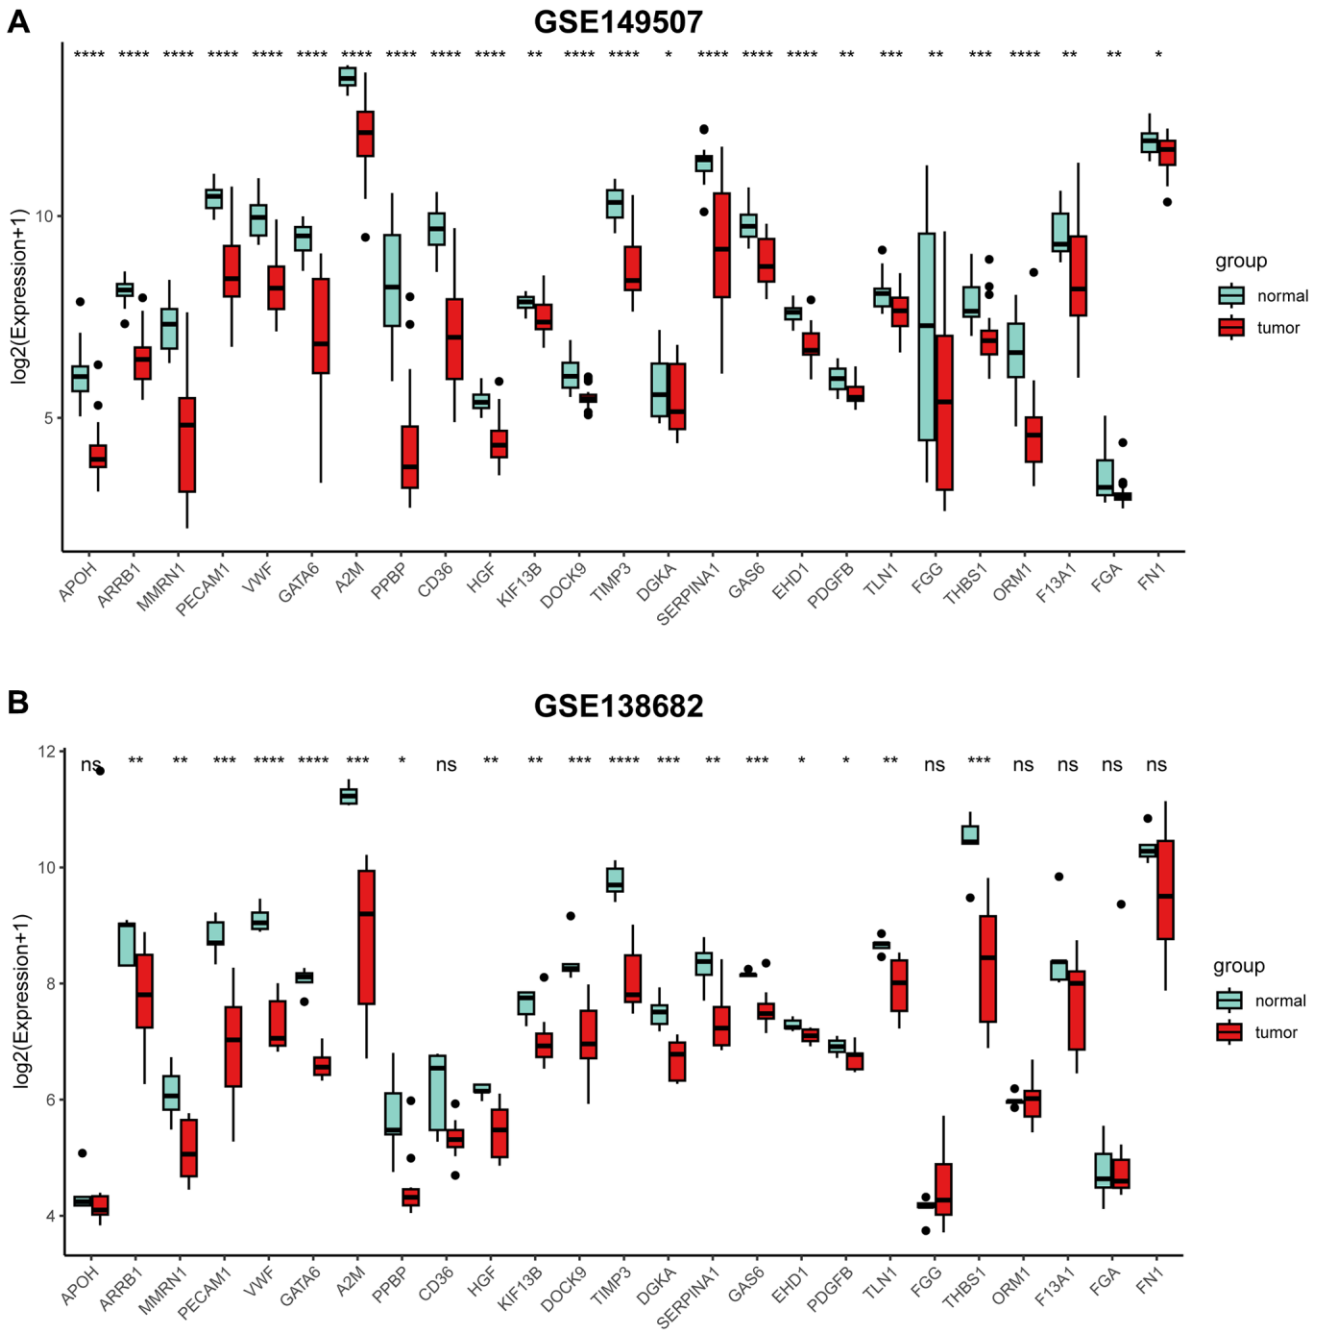

**Supplementary Figure 1. The expression analysis of 25 PRGs in public database.** (GSE149507 and GSE138682). (A, B) Boxplot showed the expression of 25 PRGs in lung cancer compared to normal tissues in two GEO cohorts. \* $P < 0.05$ , \*\* $P < 0.01$ , \*\*\* $P < 0.001$ , \*\*\*\* $P < 0.0001$  and ns represents not significant.
