# Supplementary material for: Characterization of platelet-related genes and constructing signature combined with immune-related genes for predicting outcomes and immunotherapy response in lung squamous cell carcinoma
Source: publisher site journal article supplement (doi:10.18632/aging.204886), 2023-07-20
Supplement: Supplementary file [file aging-v15i14-204886-supplementary-material-SD2.pdf]

## SUPPLEMENTARY TABLE

Supplementary Table 1. Basic information of datasets included in this study.

| Accession number/<br>Source | Platform                                                  | Sample |        |
|-----------------------------|-----------------------------------------------------------|--------|--------|
|                             |                                                           | Tumor  | Normal |
| TCGA-LUSC                   | RNA-seq                                                   | 489    | 49     |
| GSE3141                     | Affymetrix Human Genome U133 Plus 2.0 Array               | 61     | 0      |
| GSE12472                    | Agilent-012391 Whole Human Genome Oligo Microarray G4112A | 35     | 0      |
| GSE30219                    | Affymetrix Human Genome U133 Plus 2.0 Array               | 110    | 0      |
| GSE157011                   | Affymetrix Human Genome U133 Plus 2.0 Array               | 484    | 0      |
| GSE138682                   | Affymetrix Human Genome U133 Plus 2.0 Array               | 5      | 5      |
| GSE149507                   | Affymetrix Human Genome U133 Plus 2.0 Array               | 18     | 18     |
| GSE78220                    | Illumina HiSeq 2000                                       | 28     | 0      |
| GSE176307                   | Ion Torrent S5 XL                                         | 90     | 0      |
| GSE135222                   | Illumina HiSeq 2500                                       | 27     | 0      |
| E-MTAB-6149                 | 10x Genomics                                              | 5      | 0      |
